# Supplementary material
Source: PubMed Central journal article supplement (PMC2997037)

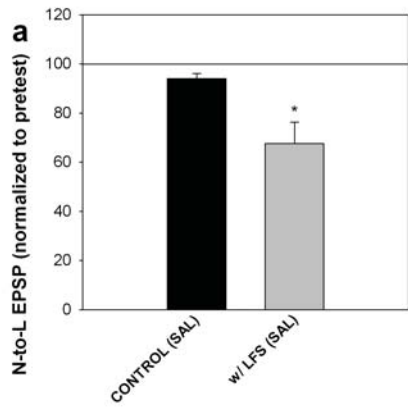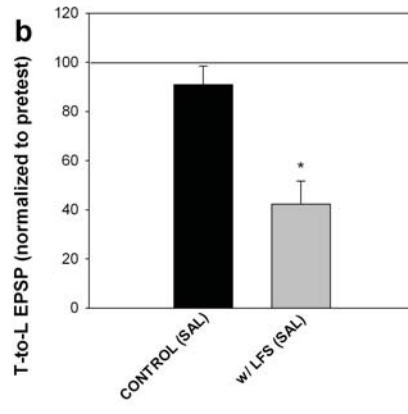

Supplement: 00491.2010_1.pdf [file 00491.2010_1.pdf]

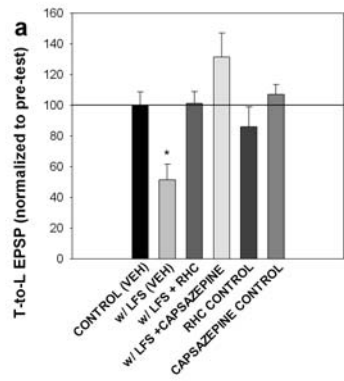

Supplement: 00491.2010_2.pdf [file 00491.2010_2.pdf]
